# Supplementary material for: Host-induced alteration of the neighbors of single platinum atoms enables selective and stable hydrogenation of butadiene
Source: Royal Society of Chemistry journal article supplement (doi:10.1039/d2nr02300h), 2022-01-01
Supplement: d2nr02300h1.pdf [file d2nr02300h1.pdf]

## Host-induced alteration of the neighbors of single platinum atom enables selective and stable hydrogenation of butadiene

Yi Wang,<sup>†a</sup> Mengru Wang,<sup>†a</sup> Xiaoling Mou,<sup>\*a,b</sup> Shiyi Wang,<sup>a</sup> Xunzhu Jiang,<sup>c,d</sup> Zupeng Chen,<sup>e</sup> Zheng Jiang,<sup>f</sup> Ronghe Lin<sup>\*a,b</sup> and Yunjie Ding<sup>\*a,g,h</sup>

---

<sup>a</sup>Hangzhou Institute of Advanced studies, Zhejiang Normal University, 1108 Gengwen Road, Hangzhou 311231, China. Email: xiaoling.mou@zjnu.edu.cn, catalysis.lin@zjnu.edu.cn, dyj@dicp.ac.cn

<sup>b</sup>Key Laboratory of the Ministry of Education for Advanced Catalysis Materials, Zhejiang Normal University, 688 Yingbin Road, Jinhua 321004, China.

<sup>c</sup>CAS Key Laboratory of Science and Technology on Applied Catalysis, Dalian Institute of Chemical Physics, Chinese Academy of Sciences 457 Zhongshan Road, Dalian, 116023, China.

<sup>d</sup>University of Chinese Academy of Sciences, Beijing 100049, China

<sup>e</sup>International Innovation Center for Forest Chemicals and Materials, College of Chemical Engineering, Nanjing Forestry University, 159 Longpan Road, Nanjing 210037, China.

<sup>f</sup>Shanghai Synchrotron Radiation Facility, Zhangjiang Lab  
Shanghai Advanced Research Institute, Chinese Academy of Sciences  
Shanghai 201204, China.

<sup>g</sup>Dalian National Laboratory for Clean Energy, Dalian Institute of Chemical Physics, Chinese Academy of Sciences, 457 Zhongshan Road, Dalian 116023, China.

<sup>h</sup>The State Key Laboratory of Catalysis, Dalian Institute of Chemical Physics, Chinese Academy of Sciences, 457 Zhongshan Road, Dalian 116023, China.

<sup>†</sup> These authors contributed equally.

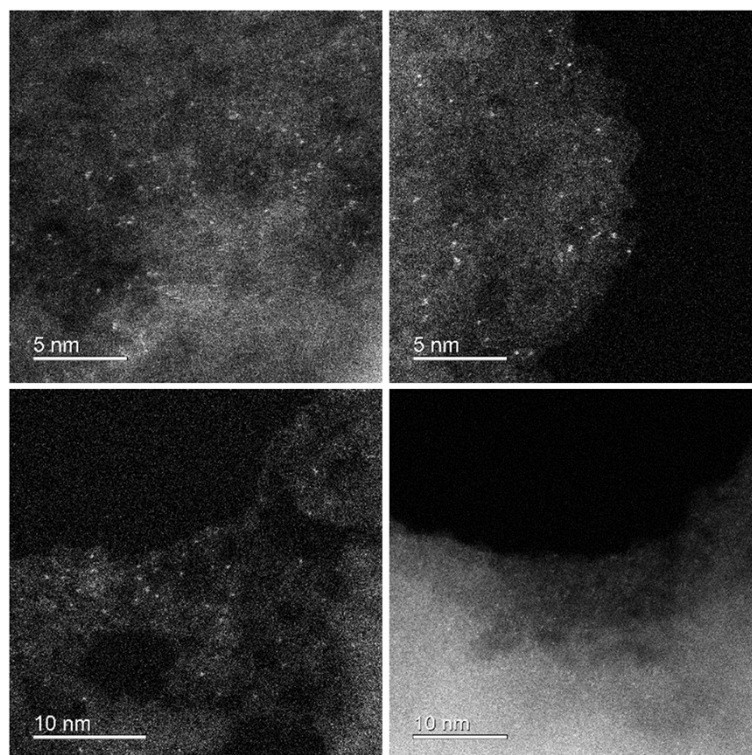

**Figure S1.** Additional HAADF-STEM images of the single-atom Pt/C<sub>3</sub>N<sub>4</sub> catalyst.

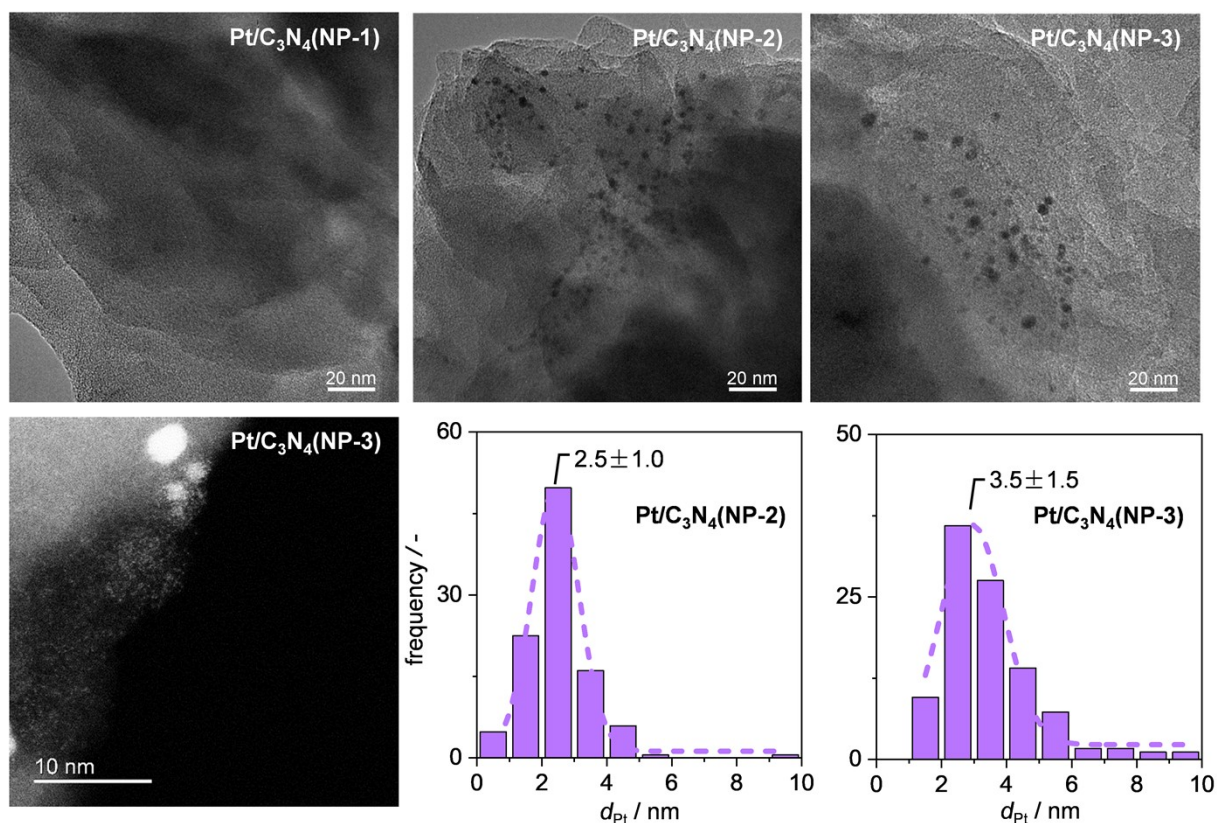

**Figure S2.** TEM and HAADF-STEM images of the Pt/C<sub>3</sub>N<sub>4</sub> catalysts after reduced in H<sub>2</sub> for 1 h at different temperatures: 473 K, NP-1; 523 K, NP-2; 573 K, NP-3. Very few Pt particles can be observed for NP-1, while both single atoms and big nanoparticles were visualized by HAADF-STEM on NP-3. These observations suggested that single-atom Pt were largely aggregated but could still be existed even after reduction at 573 K.

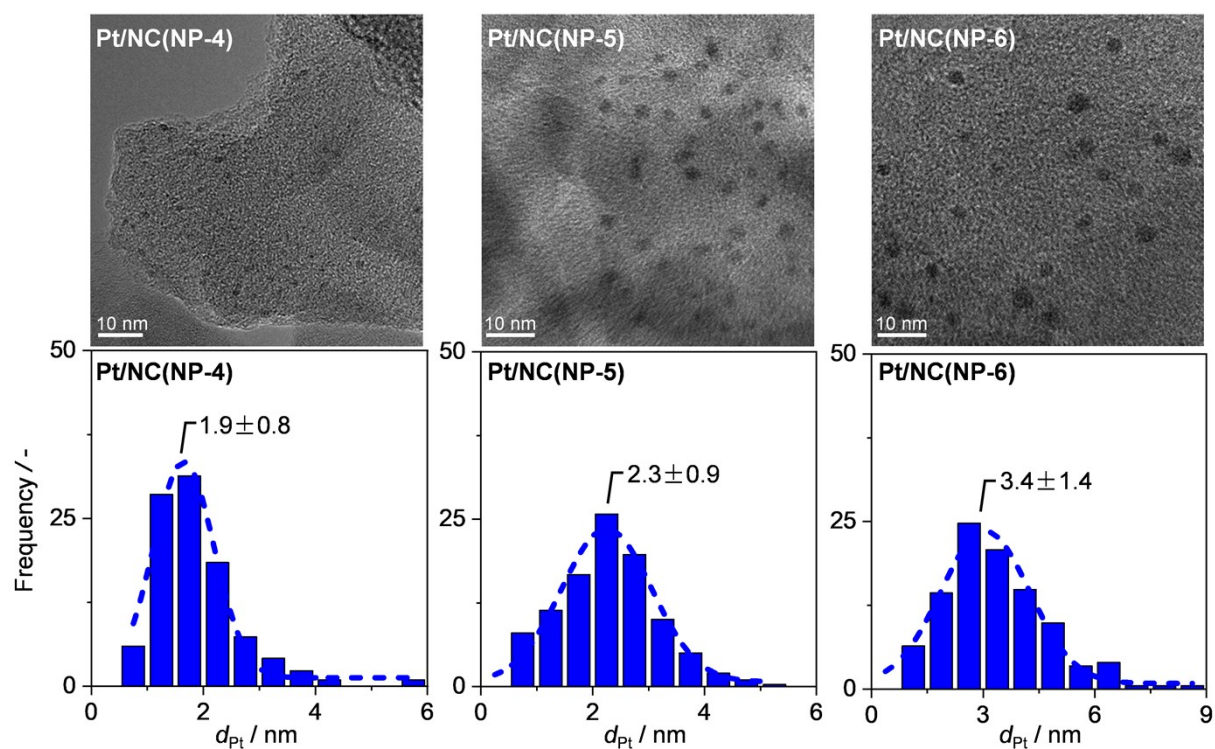

**Figure S3.** TEM images of the Pt/NC nanoparticle catalysts accompanied with the mean particle size distributions (>200 particles counted).
